# Supplementary material for: Postprandial glycaemic dips predict appetite and energy intake in healthy individuals
Source: Springer Nature journal article supplement (doi:10.1038/s42255-021-00383-x), 2021-04-12
Supplement: 42255_2021_383_MOESM1_ESM.pdf [file 42255_2021_383_MOESM1_ESM.pdf]

## Reporting Summary

Nature Research wishes to improve the reproducibility of the work that we publish. This form provides structure for consistency and transparency in reporting. For further information on Nature Research policies, see our [Editorial Policies](#) and the [Editorial Policy Checklist](#).

### Statistics

For all statistical analyses, confirm that the following items are present in the figure legend, table legend, main text, or Methods section.

n/a Confirmed

- The exact sample size ( $n$ ) for each experimental group/condition, given as a discrete number and unit of measurement
- A statement on whether measurements were taken from distinct samples or whether the same sample was measured repeatedly
- The statistical test(s) used AND whether they are one- or two-sided  
*Only common tests should be described solely by name; describe more complex techniques in the Methods section.*
- A description of all covariates tested
- A description of any assumptions or corrections, such as tests of normality and adjustment for multiple comparisons
- A full description of the statistical parameters including central tendency (e.g. means) or other basic estimates (e.g. regression coefficient) AND variation (e.g. standard deviation) or associated estimates of uncertainty (e.g. confidence intervals)
- For null hypothesis testing, the test statistic (e.g.  $F$ ,  $t$ ,  $r$ ) with confidence intervals, effect sizes, degrees of freedom and  $P$  value noted  
*Give  $P$  values as exact values whenever suitable.*
- For Bayesian analysis, information on the choice of priors and Markov chain Monte Carlo settings
- For hierarchical and complex designs, identification of the appropriate level for tests and full reporting of outcomes
- Estimates of effect sizes (e.g. Cohen's  $d$ , Pearson's  $r$ ), indicating how they were calculated

*Our web collection on [statistics for biologists](#) contains articles on many of the points above.*

### Software and code

Policy information about [availability of computer code](#)

Data collection Data from questionnaires, clinical visits and laboratory data was entered using comma delimited files, excel spreadsheets and microsoft access. CGM data was imported from text files into the analysis pipeline

Data analysis Analyses were carried out in R 3.4.2 Core team, Python 3.7, using Pandas 0.25.1, Scipy 1.3.1, Pingouin 0.3.3.

For manuscripts utilizing custom algorithms or software that are central to the research but not yet described in published literature, software must be made available to editors and reviewers. We strongly encourage code deposition in a community repository (e.g. GitHub). See the Nature Research [guidelines for submitting code & software](#) for further information.

### Data

Policy information about [availability of data](#)

All manuscripts must include a [data availability statement](#). This statement should provide the following information, where applicable:

- Accession codes, unique identifiers, or web links for publicly available datasets
- A list of figures that have associated raw data
- A description of any restrictions on data availability

The data used for analyzing this study are held by the department of Twin Research at Kings College London. The data can be released to bona fide researchers using our normal procedures overseen by the Wellcome Trust and its guidelines as part of our core funding. We receive around 100 requests per year for our datasets and have a meeting three times a month with independent members to assess proposals Application is via <https://twinsuk.ac.uk/resources-forresearchers/access-our-data/>. This means that the data needs to be anonymized and conform to GDPR standards. Specifically for this paper, all the variables used in the models can be requested as well as the summary outcome measures for each person.

## Field-specific reporting

Please select the one below that is the best fit for your research. If you are not sure, read the appropriate sections before making your selection.

Life sciences       Behavioural & social sciences       Ecological, evolutionary & environmental sciences

For a reference copy of the document with all sections, see [nature.com/documents/nr-reporting-summary-flat.pdf](https://www.nature.com/documents/nr-reporting-summary-flat.pdf)

## Life sciences study design

All studies must disclose on these points even when the disclosure is negative.

|                 |                                                                                                                                                                                                                                                                                                                               |
|-----------------|-------------------------------------------------------------------------------------------------------------------------------------------------------------------------------------------------------------------------------------------------------------------------------------------------------------------------------|
| Sample size     | 1002 individuals were recruited for the UK cohort (allowing for 80% power to detect correlations $r=0.15$ with $p<0.0001$ to allow adjustment for 500 test), 100 for the US cohort to enable replication of the larger effects (80% for $r=0.28$ with $p<0.05$ ), the final sample size excludes individuals who dropped out. |
| Data exclusions | wherever a participant did not complete a meal challenge or did not report a meal in duplicate the participant was excluded from specific analyses. The exclusions are explained in Suppl Figure 1 and all meal and participant sample sizes for each analysis are detailed in each figure                                    |
| Replication     | the US cohort has been used as replication for findings in the larger UK cohort                                                                                                                                                                                                                                               |
| Randomization   | not applicable as this is a single arm interventional study                                                                                                                                                                                                                                                                   |
| Blinding        | not applicable as this is a single arm interventional study                                                                                                                                                                                                                                                                   |

## Reporting for specific materials, systems and methods

We require information from authors about some types of materials, experimental systems and methods used in many studies. Here, indicate whether each material, system or method listed is relevant to your study. If you are not sure if a list item applies to your research, read the appropriate section before selecting a response.

### Materials & experimental systems

| n/a                                 | Involvement in the study                                        |
|-------------------------------------|-----------------------------------------------------------------|
| <input checked="" type="checkbox"/> | <input type="checkbox"/> Antibodies                             |
| <input checked="" type="checkbox"/> | <input type="checkbox"/> Eukaryotic cell lines                  |
| <input checked="" type="checkbox"/> | <input type="checkbox"/> Palaeontology and archaeology          |
| <input checked="" type="checkbox"/> | <input type="checkbox"/> Animals and other organisms            |
| <input type="checkbox"/>            | <input checked="" type="checkbox"/> Human research participants |
| <input type="checkbox"/>            | <input checked="" type="checkbox"/> Clinical data               |
| <input checked="" type="checkbox"/> | <input type="checkbox"/> Dual use research of concern           |

### Methods

| n/a                                 | Involvement in the study                        |
|-------------------------------------|-------------------------------------------------|
| <input checked="" type="checkbox"/> | <input type="checkbox"/> ChIP-seq               |
| <input checked="" type="checkbox"/> | <input type="checkbox"/> Flow cytometry         |
| <input checked="" type="checkbox"/> | <input type="checkbox"/> MRI-based neuroimaging |

## Human research participants

Policy information about [studies involving human research participants](#)

|                            |                                                                                                                                                                                                                                                                                                                                                                                                                                                                                                                                                                                                                                                                                                                        |
|----------------------------|------------------------------------------------------------------------------------------------------------------------------------------------------------------------------------------------------------------------------------------------------------------------------------------------------------------------------------------------------------------------------------------------------------------------------------------------------------------------------------------------------------------------------------------------------------------------------------------------------------------------------------------------------------------------------------------------------------------------|
| Population characteristics | Study participants were healthy individuals aged between 18-65 years and able to provide written informed consent. No exclusions were made based on gender, ethnicity or any other characteristic.                                                                                                                                                                                                                                                                                                                                                                                                                                                                                                                     |
| Recruitment                | Participants enrolled already in the TwinsUK cohort were recruited as part of studies which are included in the cohort's annual newsletter and also mentioned on our website: <a href="http://www.twinsuk.ac.uk/">http://www.twinsuk.ac.uk/</a> Non-twins were recruited via independent recruitment agencies, project specific website and online advertising including the use of social media platforms and social media. As with most volunteer studies, there may have been a bias to enroll more health-conscious individuals than the general population however given that the study focused on post-prandial responses in healthy individuals this is unlikely to in any way bias our scientific conclusions. |
| Ethics oversight           | Ethics was granted by the London - Hampstead Research Ethics Committee (REC approval 18/LO/0663) Research Ethics Committee and Integrated Research Application System (IRAS 236407) and by the Partners Healthcare IRB (2018P002078)                                                                                                                                                                                                                                                                                                                                                                                                                                                                                   |

Note that full information on the approval of the study protocol must also be provided in the manuscript.

## Clinical data

---

Policy information about [clinical studies](#)

All manuscripts should comply with the ICMJE [guidelines for publication of clinical research](#) and a completed [CONSORT checklist](#) must be included with all submissions.

|                             |                                                                                                                                                                                                                             |
|-----------------------------|-----------------------------------------------------------------------------------------------------------------------------------------------------------------------------------------------------------------------------|
| Clinical trial registration | NCT03479866                                                                                                                                                                                                                 |
| Study protocol              | <a href="https://clinicaltrials.gov/ct2/show/record/NCT03479866">https://clinicaltrials.gov/ct2/show/record/NCT03479866</a>                                                                                                 |
| Data collection             | Data was collected at St Thomas' Hospital, London and Massachusetts General Hospital, Boston. . The first participant was enrolled on 4 August 2018, the last clinical visit was completed on 24 April 2019.                |
| Outcomes                    | The primary outcomes as per the protocol were glucose and triglyceride blood concentration. Secondary outcomes include energy intake using a smartphone app, hunger/ alertness using an app and gut microbiome composition. |
